# Supplementary material for: Pathogen prevalence and abundance in honey bee colonies involved in almond pollination
Source: PubMed Central journal article supplement (PMC4766222; doi:10.1007/s13592-015-0395-5), 2015-10-21
Supplement: 13592_2015_395_MOESM3_ESM.pdf [file 13592_2015_395_MOESM3_ESM.pdf]

**Pathogen prevalence and abundance in honey bee colonies involved in almond  
pollination**

Ian Cavigli, Katie F. Daughenbaugh, Madison Martin, Michael Lerch, Katie Banner,  
Emma Garcia, Laura M. Brutscher, Michelle L. Flenniken\*

\*corresponding author: Michelle L. Flenniken, Department of Plant Sciences and Plant Pathology,  
Montana State University, Bozeman, MT 59717 USA.

## Supplemental Figure S2. Individual Pathogen Prevalence

A. Summary of the pathogens detected in weak, strong, and average colonies using pathogen-specific PCR. The percentage of samples that tested positive for each pathogen is listed by colony strength.

|                                                  | weak (n=41) | average (n=54) | strong (n=81) |
|--------------------------------------------------|-------------|----------------|---------------|
| BQCV                                             | 56%         | 78%            | 85%           |
| CBPV                                             | 0%          | 0%             | 0%            |
| DWV                                              | 22%         | 17%            | 14%           |
| SBV                                              | 39%         | 61%            | 57%           |
| <i>P. larvae</i> (AFB)                           | 0%          | 0%             | 4%            |
| trypanosomatids<br>( <i>C.m.</i> / <i>L.p.</i> ) | 32%         | 20%            | 31%           |
| <i>N. ceranae</i>                                | 37%         | 37%            | 47%           |
| LSV1                                             | 24%         | 22%            | 27%           |
| LSV2                                             | 66%         | 63%            | 70%           |
| LSV3                                             | 7%          | 9%             | 19%           |
| LSV4                                             | 0%          | 2%             | 7%            |
| LSV5                                             | 0%          | 0%             | 0%            |
| IAPV                                             | 0%          | 0%             | 0%            |
| KBV                                              | 0%          | 0%             | 1%            |
| <i>M. plutonius</i>                              | 0%          | 0%             | 0%            |

B. Summary of the pathogens detected in weak, strong, and average colonies using pathogen-specific PCR. The percentage of samples that tested positive for each pathogen at each time period (date) is presented in relation to colony strength. This table provides an overall summary of the data. Statistical evaluation of this data was not performed since the results for each pathogen were dependent on time period and there were a significant number of 0's in the data set.

|                            | <b>weak % (n)</b> | <b>average % (n)</b> | <b>strong % (n)</b> | <b>all colonies % (n)</b> |
|----------------------------|-------------------|----------------------|---------------------|---------------------------|
| <b>BQCV</b>                |                   |                      |                     |                           |
| <b>before</b> (Oct-Dec)    | 70% (15)          | 100% (22)            | 90% (17)            | 87.0% (54)                |
| <b>during</b> (Feb)        | 10% (15)          | 50% (17)             | 50% (15)            | 40.4% (47)                |
| <b>after</b> (March-April) | 90% (7)           | 90% (7)              | 90% (31)            | 88.9% (45)                |
| <b>after2</b> (June)       | 100% (4)          | 80% (8)              | 100% (18)           | 93.3% (30)                |
|                            |                   |                      |                     |                           |
| <b>CBPV</b>                |                   |                      |                     |                           |
| <b>before</b> (Oct-Dec)    | 0% (15)           | 0% (22)              | 0% (17)             | 0% (54)                   |
| <b>during</b> (Feb)        | 0% (15)           | 0% (16)              | 0% (15)             | 0% (46)                   |
| <b>after</b> (March-April) | 0% (7)            | 0% (8)               | 0% (30)             | 0% (45)                   |
| <b>after2</b> (June)       | 0% (4)            | 0% (8)               | 0% (18)             | 0% (30)                   |
|                            |                   |                      |                     |                           |
| <b>DWV</b>                 |                   |                      |                     |                           |
| <b>before</b> (Oct-Dec)    | 30% (15)          | 20% (22)             | 10% (17)            | 20.4% (54)                |
| <b>during</b> (Feb)        | 0% (15)           | 0% (16)              | 0% (15)             | 0% (46)                   |
| <b>after</b> (March-April) | 7% (7)            | 40% (8)              | 20% (29)            | 31.8% (44)                |
| <b>after2</b> (June)       | 0% (4)            | 10% (8)              | 20% (18)            | 13.3% (30)                |
|                            |                   |                      |                     |                           |
| <b>SBV</b>                 |                   |                      |                     |                           |
| <b>before</b> (Oct-Dec)    | 40% (15)          | 100% (22)            | 50% (17)            | 66.7% (54)                |
| <b>during</b> (Feb)        | 40% (15)          | 0% (17)              | 0% (15)             | 12.8% (47)                |
| <b>after</b> (March-April) | 40% (7)           | 70% (7)              | 80% (31)            | 75.6% (45)                |
| <b>after2</b> (June)       | 30% (4)           | 90% (8)              | 60% (18)            | 63.3% (30)                |
|                            |                   |                      |                     |                           |
| <b><i>P. larvae</i></b>    |                   |                      |                     |                           |
| <b>before</b> (Oct-Dec)    | 0% (15)           | 0% (22)              | 0% (17)             | 0% (54)                   |
| <b>during</b> (Feb)        | 0% (15)           | 0% (17)              | 10% (15)            | 2.1% (47)                 |
| <b>after</b> (March-April) | 0% (7)            | 0% (7)               | 10% (31)            | 4.4% (45)                 |
| <b>after2</b> (June)       | 0% (4)            | 0% (8)               | 0% (18)             | 0% (30)                   |
|                            |                   |                      |                     |                           |
|                            | <b>weak % (n)</b> | <b>average % (n)</b> | <b>strong % (n)</b> | <b>all colonies % (n)</b> |

|                            |                   |                      |                     |                           |
|----------------------------|-------------------|----------------------|---------------------|---------------------------|
| <b>C.m. / L.p.</b>         |                   |                      |                     |                           |
| <b>before</b> (Oct-Dec)    | 30% (15)          | 20% (22)             | 30% (17)            | 27.8% (54)                |
| <b>during</b> (Feb)        | 10% (15)          | 10% (17)             | 10% (15)            | 6.4% (47)                 |
| <b>after</b> (March-April) | 100% (7)          | 70% (7)              | 60% (31)            | 68.9% (45)                |
| <b>after2</b> (June)       | 0% (4)            | 0% (8)               | 0% (18)             | 0% (30)                   |
|                            |                   |                      |                     |                           |
| <b>Nosema</b>              |                   |                      |                     |                           |
| <b>before</b> (Oct-Dec)    | 10% (15)          | 30% (22)             | 0% (17)             | 13.0% (54)                |
| <b>during</b> (Feb)        | 30% (15)          | 20% (17)             | 20% (15)            | 25.5% (47)                |
| <b>after</b> (March-April) | 100% (7)          | 70% (7)              | 60% (31)            | 64.4% (45)                |
| <b>after2</b> (June)       | 50% (4)           | 60% (8)              | 100% (18)           | 83.3% (30)                |
|                            |                   |                      |                     |                           |
| <b>LSV1</b>                |                   |                      |                     |                           |
| <b>before</b> (Oct-Dec)    | 20% (15)          | 30% (22)             | 40% (17)            | 27.8% (54)                |
| <b>during</b> (Feb)        | 50% (15)          | 10% (17)             | 10% (15)            | 21.3% (47)                |
| <b>after</b> (March-April) | 0% (7)            | 40% (7)              | 40% (31)            | 33.3% (45)                |
| <b>after2</b> (June)       | 0% (4)            | 10% (8)              | 20% (18)            | 13.3% (30)                |
|                            |                   |                      |                     |                           |
| <b>LSV2</b>                |                   |                      |                     |                           |
| <b>before</b> (Oct-Dec)    | 50% (15)          | 60% (22)             | 10% (17)            | 42.6% (54)                |
| <b>during</b> (Feb)        | 50% (15)          | 40% (17)             | 70% (15)            | 55.3% (47)                |
| <b>after</b> (March-April) | 100% (7)          | 90% (7)              | 80% (31)            | 86.7% (45)                |
| <b>after2</b> (June)       | 100% (4)          | 100% (8)             | 100% (18)           | 100% (30)                 |
|                            |                   |                      |                     |                           |
| <b>LSV3</b>                |                   |                      |                     |                           |
| <b>before</b> (Oct-Dec)    | 0% (15)           | 10% (22)             | 0% (17)             | 1.9% (54)                 |
| <b>during</b> (Feb)        | 10% (15)          | 10% (17)             | 0% (15)             | 4.3% (47)                 |
| <b>after</b> (March-April) | 30% (7)           | 40% (7)              | 40% (31)            | 37.8% (45)                |
| <b>after2</b> (June)       | 0% (4)            | 0% (8)               | 20% (18)            | 10.0% (30)                |
|                            |                   |                      |                     |                           |
| <b>LSV4</b>                |                   |                      |                     |                           |
| <b>before</b> (Oct-Dec)    | 0% (15)           | 0% (22)              | 0% (17)             | 0% (54)                   |
| <b>during</b> (Feb)        | 0% (15)           | 0% (17)              | 0% (15)             | 0% (47)                   |
| <b>after</b> (March-April) | 0% (7)            | 10% (7)              | 0% (31)             | 2.2% (45)                 |
| <b>after2</b> (June)       | 0% (4)            | 0% (8)               | 30% (18)            | 20% (30)                  |
|                            |                   |                      |                     |                           |
|                            | <b>weak % (n)</b> | <b>average % (n)</b> | <b>strong % (n)</b> | <b>all colonies % (n)</b> |
| <b>LSV5</b>                |                   |                      |                     |                           |

|                            |         |         |          |           |
|----------------------------|---------|---------|----------|-----------|
| <b>before</b> (Oct-Dec)    | 0% (15) | 0% (22) | 0% (17)  | 0% (54)   |
| <b>during</b> (Feb)        | 0% (15) | 0% (17) | 0% (15)  | 0% (47)   |
| <b>after</b> (March-April) | 0% (7)  | 0% (7)  | 0% (31)  | 0% (45)   |
| <b>after2</b> (June)       | 0% (4)  | 0% (8)  | 0% (18)  | 0% (30)   |
|                            |         |         |          |           |
| <b>IAPV</b>                |         |         |          |           |
| <b>before</b> (Oct-Dec)    | 0% (15) | 0% (22) | 0% (17)  | 0% (54)   |
| <b>during</b> (Feb)        | 0% (15) | 0% (17) | 0% (15)  | 0% (47)   |
| <b>after</b> (March-April) | 0% (7)  | 0% (7)  | 0% (31)  | 0% (45)   |
| <b>after2</b> (June)       | 0% (4)  | 0% (8)  | 0% (18)  | 0% (30)   |
|                            |         |         |          |           |
| <b>ABPV</b>                |         |         |          |           |
| <b>before</b> (Oct-Dec)    | 0% (15) | 0% (22) | 0% (17)  | 0% (54)   |
| <b>during</b> (Feb)        | 0% (15) | 0% (17) | 0% (15)  | 0% (47)   |
| <b>after</b> (March-April) | 0% (7)  | 0% (7)  | 0% (31)  | 0% (45)   |
| <b>after2</b> (June)       | 0% (4)  | 0% (8)  | 0% (18)  | 0% (30)   |
|                            |         |         |          |           |
| <b>KBV</b>                 |         |         |          |           |
| <b>before</b> (Oct-Dec)    | 0% (15) | 0% (22) | 0% (17)  | 0% (54)   |
| <b>during</b> (Feb)        | 0% (15) | 0% (17) | 0% (15)  | 0% (47)   |
| <b>after</b> (March-April) | 0% (7)  | 0% (7)  | 0% (31)  | 0% (45)   |
| <b>after2</b> (June)       | 0% (4)  | 0% (8)  | 10% (18) | 3.3% (30) |
|                            |         |         |          |           |
| <b><i>M. plutonius</i></b> |         |         |          |           |
| <b>before</b> (Oct-Dec)    | 0% (15) | 0% (22) | 0% (17)  | 0% (54)   |
| <b>during</b> (Feb)        | 0% (15) | 0% (17) | 0% (15)  | 0% (47)   |
| <b>after</b> (March-April) | 0% (7)  | 0% (7)  | 0% (31)  | 0% (45)   |
| <b>after2</b> (June)       | 0% (4)  | 0% (8)  | 0% (18)  | 0% (30)   |
|                            |         |         |          |           |
