# Supplementary material for: Pathogen prevalence and abundance in honey bee colonies involved in almond pollination
Source: PubMed Central journal article supplement (PMC4766222; doi:10.1007/s13592-015-0395-5), 2015-10-21
Supplement: 13592_2015_395_MOESM4_ESM.pdf [file 13592_2015_395_MOESM4_ESM.pdf]

**Pathogen prevalence and abundance in honey bee colonies involved in almond  
pollination**

Ian Cavigli, Katie F. Daughenbaugh, Madison Martin, Michael Lerch, Katie Banner,  
Emma Garcia, Laura M. Brutscher, Michelle L. Flenniken\*

\*corresponding author: Michelle L. Flenniken, Department of Plant Sciences and Plant Pathology,  
Montana State University, Bozeman, MT 59717 USA.

**Supplemental Table S1. Primers used in this study.**

| <b>Genome / Gene Name</b>                                   | <b>NCBI # GI #</b>                       | <b>Primer Name</b>                       | <b>Sequence (5'-3')</b>                                | <b>Product Size (bp)</b> | <b>Reference</b>                               |
|-------------------------------------------------------------|------------------------------------------|------------------------------------------|--------------------------------------------------------|--------------------------|------------------------------------------------|
| <b>Ribosomal protein L8 (<i>Apis m.</i>)</b>                | XM_393671.5<br>GI:571556074              | Rpl8Fw<br>Rpl8Rev                        | TGGATGTTCAACAGGGTTCATA<br>CTGGTGGTGGACGTATTGATAA       | 121                      | Evans et al. (2006)<br>Insect Mol Bio          |
| <b>Lake Sinai virus 1 (LSV1)</b>                            | HQ871931<br>GI:335057596                 | qLSV1-F-2569<br>qLSV1-R-2743**           | AGAGGTTGCACGGCAGCATG<br>GGGACGCAGCAGCATGCTCA           | 174                      | Runckel, Flenniken (2011) PLoS One             |
| <b>Lake Sinai virus 2 (LSV2)</b>                            | HQ888865<br>GI:335057589                 | qLSV2-F-1722<br>qLSV2-R-1947**           | CGTGCTGAGGCCACGGTTGT<br>GCGGTGTCGATCTCGCGGAC           | 225                      | Runckel, Flenniken (2011) PLoS One             |
| <b>Lake Sinai Virus 3 (LSV3)</b>                            | JQ480620<br>GI:386289721                 | LSV3-F-2186<br>LSV3-R-2429               | CGTGAGCACGATGAGTCAGT<br>TGGAGGTGCTTGTTCATAA            | 243                      | Daughenbaugh, et al. (2015) Viruses            |
| <b>Lake Sinai virus 4 (LSV4)</b>                            | JX878492<br>GI:512134519                 | LSV4-F-1896<br>LSV4-R-2278               | CCATCTCCTCATCCACGTTT<br>GATTCCCAAATCAGGCTCAA           | 379                      | Daughenbaugh, et al. (2015) Viruses            |
| <b>Lake Sinai virus 5 (LSV5)</b>                            | KC880124<br>GI:537367126                 | LSV5-F-2081<br>LSV5-R-2270               | TCCGATACTCACGACGAACA<br>GACACGCGTCAATATCATGG           | 190                      | Daughenbaugh, et al. (2015) Viruses            |
| <b>black queen cell virus (BQCV)</b>                        | AF183905<br>GI:8100530                   | qBQCVorf2F_6664<br>qBQCVorf2R_6805       | TCCTCAAATCTGGAGCGAAC<br>GTATTCGCTGGCCGTAAAC            | 141                      | Runckel, Flenniken (2011) PLoS One             |
| <b>deformed wing virus (DWV)</b>                            | AY292384.1<br>GI:31540603                | DWVfw1165<br>DWVrev1338                  | CTTACTCTGCCGTCGCCCA<br>CCGTTAGGAACCTATTATCGCG          | 173                      | Chen et a. (2005) J Invert Path                |
| <b>sacbrood virus (SBV)</b>                                 | AF092924.1<br>GI:4416206                 | SBV_F2_5120<br>SBV_R2_5243               | AATGTCACCCACGAGTGTG<br>GCGATGCAACCATACAACCTG           | 123                      | Daughenbaugh, et al. (2015) Viruses            |
| <b><i>Crithidia mellificae</i> / <i>Lotmaria passim</i></b> | PRJNA78249<br>AHIJ01002555<br>Contig 777 | qCrFw1<br>qCrRev1                        | TCCACTCTGCAAACGATGAC<br>GGGCCGAATGGAAAAGATAC           | 153                      | Runckel, Flenniken (2011) PLoS One             |
| <b><i>P. larvae</i></b>                                     | PRJNA30269                               | PL2-Fw<br>PL2-Rev                        | CGGGAGACGCCAGGTTAG<br>TTCTTCCTTGGAACAGAGC              | 380                      | Marinez et al 2010;<br>Marinez et al 2011      |
| <b>acute bee paralysis virus (ABPV)</b>                     | NC_002548.1<br>GI:10314009               | qABPV-F-5457<br>qABPV-R-5634             | GGATGAGAGAAGACCAATTG<br>CCAATCTTGGGAATAAACATTAGTTC     | 177                      | Highfield et al. (2009)<br>Appl Environ Micro; |
| <b>chronic bee paralysis virus (CBPV)</b>                   | NC_010711.1<br>GI:188543025              | CBPV-F_2580<br>CBPV-R_3034               | AGTTGTCATGGTTAACAGGATACGAG<br>TCTAATCTTAGCACGAAAGCCGAG | 454                      | Ribiere et al. (2002)<br>Apidologie            |
| <b>Israeli acute paralysis virus (IAPV)</b>                 | NC_009025.1<br>GI:126010924              | IAPV_F_7762<br>IAPV_R_7876               | GCAGCTATTTTTGGCTGGTC<br>CCAATGTACGCTCATATCG            | 114                      | Daughenbaugh, et al. (2015) Viruses            |
| <b>Kashmir bee virus (KBV)</b>                              | NC_004807.1<br>GI:30793779               | KBV_F_4470<br>KBV_R_4581                 | TCGACAAGGACATGATCGAG<br>GAGCCACAATGGCTTCTTC            | 111                      | Stoltz et al. (1995)<br>J Apicult Res          |
| <b><i>Nosema spp.</i></b>                                   | DQ235446.1<br>GI:78100222                | Nos pan rRNA F-322<br>Nos pan rRNA R-529 | GGCAGTTATGGGAAGTAACA<br>GGTCGTCACATTCATCTCT            | 207                      | Chen et al. (2008)<br>J Inv Path               |
| <b><i>N. ceranae</i></b>                                    | DQ673615.1<br>GI:110293152               | N ceranae F-4186<br>N ceranae R-4435     | CGGATAAAAGAGTCCGTTACC<br>TGAGCAGGGTTCTAGGGAT           | 249                      | Chen et al. (2008) J Inv Path                  |
| <b><i>M. plutonius</i></b>                                  | PRJDA73165                               | MelissoF<br>MelissoR                     | CAGCTAGTCGGTTTGGTTCC<br>TTGGCTGTAGATAGAATTGACAAT       | 796                      | Roetschi et al 2007;<br>Roetschi et al 2008    |
