# Supplementary material for: Pathogen prevalence and abundance in honey bee colonies involved in almond pollination
Source: PubMed Central journal article supplement (PMC4766222; doi:10.1007/s13592-015-0395-5), 2015-10-21
Supplement: 13592_2015_395_MOESM6_ESM.pdf [file 13592_2015_395_MOESM6_ESM.pdf]

1 Ian Cavigli<sup>1</sup>, Katie Daughenbaugh<sup>1</sup>, Madison Martin<sup>1</sup>, Michael Lerch<sup>4</sup>, Katie Banner<sup>4</sup>,  
2 Emma Garcia<sup>1</sup>, Laura M. Brutscher<sup>1,2,3</sup>, and Michelle L. Flenniken<sup>\*,1,2</sup>

3  
4 <sup>1</sup>Department of Plant Sciences and Plant Pathology, <sup>2</sup>Institute on Ecosystems,  
5 <sup>3</sup>Department of Microbiology and Immunology, <sup>4</sup>Department of Mathematical Sciences,  
6 Montana State University, Bozeman, MT, USA, 59717

7 \*corresponding author: Michelle L. Flenniken, Department of Plant Sciences and Plant  
8 Pathology, Montana State University, Bozeman, MT 59717 U.S.A.

9

## 10 **Supporting Methods**

### 11 **2.1. Longitudinal monitoring/sampling of commercially managed honey bee** 12 **colonies**

13 Three Montana-based (Broadwater, Yellowstone, Treasure counties) commercial  
14 beekeeping operations that transport their honey bee colonies ~ 1,200 miles to  
15 California (Merced and Stanislaus counties) each winter for the almond bloom provided  
16 honey bee samples before, during, and after almond pollination (February 2014) (Figure  
17 1). Colony health, using colony population size as a proxy, was assessed by the  
18 number of frames covered with honey bees (frame counts) at each sampling event  
19 (Delaplane and van der Steen 2013; OSU 2011). Colony strength was defined as  
20 follows: weak colonies (< 5 frames covered with bees), average colonies (6-8 frames  
21 covered with bees), and strong colonies (> 9 frames covered with bees). Live honey bee  
22 samples (~ 100 per sample) were obtained from the top of the frames in the middle of  
23 the colony. Samples were composed of female bees of mixed age, including nurse,

24 worker, and forager bees. The samples were collected on ice or dry ice, stored at -20°C,  
25 shipped on dry ice, and transferred to -80°C prior to analysis. At the onset of the study  
26 in November 2013, each beekeeper identified 15 – 20 colonies of differential health.  
27 Specifically, Operation 3 initiated the study with 5 weak, 5 average, and 5 strong  
28 colonies and provided samples at three time points; Operation 2 initiated the study with  
29 5 weak, 13 average, and 2 strong colonies and provide samples at 4 time points; and  
30 Operation 1 initiated the study with 5 weak, 4 average, and 10 strong colonies and  
31 provide samples at 4 time points (Supplemental Table S2). A total of 176 honey bee  
32 samples with corresponding colony strength observations were obtained and analyzed,  
33 4 observations of colony strength lacked corresponding samples, and 8 of the original  
34 colonies died during the course of this study (Supplemental Table S2). Operation 3  
35 manages ~7,100 colonies, Operation 2 manages ~12,500 colonies, and Operation 1  
36 manages ~3,500 colonies. All the colonies in this study were fed protein patties either  
37 before (Operation 3 – November and January, Operation 2 – November) or during  
38 almond pollination (Operation 1). In addition, Operation 2 treated monitor colonies with  
39 an antifungal treatment (Fumagilin-B®) and fed them Pro-Health®. After almond  
40 pollination in May 2014, Operation 2 treated for *Varroa destructor* mites (i.e., two strips  
41 of Apivar® per colony), fed pollen patties, and treated some colonies with an antibiotic  
42 (Terramycin®). Operation 1 treated some colonies with Bee Shield® before almond  
43 pollination (December 2013), and fed colonies essential oils in addition to protein patties  
44 immediately before the almond bloom. Operation 1 also treated some colonies with the  
45 antibiotic Terramycin® immediately after almond pollination, and fed sugar syrup and  
46 essential oils and treated for mites prior to the last sample date in May 2014.

47

## 48 **2.2. Honey bee samples**

49 Five female bees from each sample were used for RNA extraction, cDNA synthesis,  
50 pathogen-specific PCR, and qPCR (Runckel, Flenniken et al. 2011). There are varying  
51 recommendations of the number of honey bees required to adequately assess the  
52 pathogens associated with a single honey bee colony at a particular point in time (Chen  
53 et al. 2014; de Miranda et al. 2013; Genersch et al. 2010; Pirk et al. 2013). Successful  
54 pathogen detection is dependent upon sensitivity of the assay and signal to noise ratio  
55 of each sample (i.e., pathogen RNA to bee RNA ratio). The objective for pathogen  
56 screening in our study was to identify the most prevalent pathogens associated with  
57 honey bees sampled from individual colonies at each sampling event. Based on  
58 empirical data, literature values, and practical sample handling considerations, we  
59 assayed five bees per colony per sampling event. The following equation from Pirk et al.  
60 2013,  $N = \ln(1-D) / \ln(1-P)$  ( $N$ =sample size,  $\ln$ =natural logarithm,  $D$ =probability of  
61 detection,  $P$ =proportion of infected bees) predicts that with a sample size of five bees,  
62 pathogenic infections affecting 45% or more of the individuals within a colony would be  
63 detected with 95% probability (Pirk et al. 2013); this sample size has proven sufficient  
64 for the pathogen-specific PCR detection of highly prevalent pathogens (Daughenbaugh  
65 et al. 2015; Runckel, Flenniken et al. 2011).

66

## 67 **2.3. RNA isolation**

68 Bee samples were homogenized in 800  $\mu$ L sterile H<sub>2</sub>O with sterile beads (3 mm) using a  
69 TissueLyzer (Qiagen) at 30 Hz for 2 min. Bee samples were centrifuged for 12 min at

70 12,000xg at 4°C to pellet debris, and supernatants were transferred to new 1.5 mL  
71 tubes containing an equal volume of Trizol reagent (Life Technologies). RNA was  
72 extracted according to the manufacturer's instructions and was suspended in sterile  
73 water.

74

## 75 **2.5. Polymerase Chain Reaction (PCR)**

76 PCR was performed according to standard methods (Runckel, Flenniken et al. 2011, de  
77 Miranda et al. 2013; Govan et al. 2000; Lanzi et al. 2006; Maori et al. 2007). In brief, 1  
78 µl cDNA template was combined with 10 pmol of each forward and reverse primer, and  
79 amplified with ChoiceTaq polymerase (Denville) according to the manufacturer's  
80 instructions using the following cycling conditions: 95°C for 5 min; 35 cycles of 95°C for  
81 30 s, 57°C for 30 s, and 72°C for 30s, followed by final elongation at 72°C for 4 min. The  
82 PCR products were visualized by gel electrophoresis/fluorescence imaging. To  
83 minimize the number of negative PCR-tests, we pooled samples (<10) for initial PCR  
84 analysis and then assessed individual samples for each pathogen detected in pooled  
85 analysis. Positive and negative control reactions were included for each set of reactions.

86

## 87 **2.6. Quantitative PCR (qPCR)**

88 Quantitative PCR was used to analyze the relative abundance of the most prevalent  
89 pathogens in select samples to investigate the relationship between pathogen  
90 abundance and honey bee colony health. Five hundred ng of RNA from each of these  
91 samples was reverse transcribed with M-MLV as described above. All qPCR reactions  
92 were performed in triplicate with a CFX Connect Real Time instrument (BioRad) and the

93 following reaction conditions: 2  $\mu$ L of cDNA template in 20  $\mu$ L reactions containing 1X  
94 ChoiceTaq Mastermix (Denville), 0.4  $\mu$ M each forward and reverse primer, 1X SYBR  
95 Green (Life Technologies), and 3 mM MgCl<sub>2</sub>. The qPCR thermo-profile consisted of a  
96 single pre-incubation 95°C (1 min), 40 cycles of 95°C (10 s), 58°C (20 s), and 72°C (15  
97 s). Plasmid standards, containing from 10<sup>9</sup> to 10<sup>3</sup> copies per reaction, were used as  
98 qPCR templates to assess primer efficiency and quantify the relative abundance of  
99 each pathogen. The linear standard equations generated by plotting the crossing point  
100 (Cp) versus the log<sub>10</sub> of the initial plasmid copy number for each primer set were as  
101 follows: LSV2:  $y = -3.8147x + 44.805$ ,  $R^2 = 0.980$ ; BQCV:  $y = -3.7336x + 42.849$ ,  $R^2 =$   
102  $0.996$ ; LSV1:  $y = -3.1994x + 38.71$ ,  $R^2 = 0.982$ , and SBV:  $y = -3.3768x + 39.484$ ,  $R^2 =$   
103  $0.996$ . In addition, qPCR of a host encoded gene, *Apis m.* Rpl8, was performed using 2  
104  $\mu$ L cDNA template on each qPCR plate to ensure consistency and cDNA quality. qPCR  
105 products were analyzed by melting point analysis and 2% agarose gel electrophoresis.

### 106 **2.7.1. Statistical analysis of PCR**

107 For this study, we use “pathogen prevalence” to refer to the total number of pathogens  
108 detected by PCR out of a target list of 16. Though our interest is in the relationship  
109 between strength rating and pathogen prevalence, graphical analyses indicated that  
110 there were likely relationships between pathogen prevalence and sampling time as well  
111 as between strength and sampling time. Thus, we used a Poisson log-linear regression  
112 model and accounted for an interaction between sample date (time period), beekeeping  
113 operation, colony strength, and pathogen prevalence. Colonies were evaluated and  
114 sampled multiple times (i.e., either 3 or 4 times), but since subsequent measurements  
115 on a single colony were both temporally and geographically distant and graphical

116 analyses did not suggest a relationship between pathogen prevalence and subsequent  
 117 measures on a given colony, this parameter was not included in our model.  
 118 Observations with average strength rating were not included in the analysis to simplify  
 119 the inferences between strong (S) and weak (W). The natural logarithm (ln) of the  
 120 pathogen prevalence data was used in comparisons between each beekeeping  
 121 operation and time period combination; for the model, we used beekeeping Operation 1,  
 122 before almond pollination (time period 1), and weak colonies as the base level.  
 123 In all, our model can be expressed

$$y_i \sim \text{Poisson}(\mu_i)$$

$$\log(\mu_i) = \beta_0 + \beta_1 \times \text{Operation2}_i +$$

$$\beta_2 \times \text{Operation3}_i + \beta_3 \times (\text{S: period1})_i +$$

$$\beta_4 \times (\text{W: period2})_i + \beta_5 \times (\text{S: period2})_i +$$

$$\beta_6 \times (\text{W: period3})_i + \beta_7 \times (\text{S: period3})_i +$$

$$\beta_8 \times (\text{W: period4})_i + \beta_9 \times (\text{S: period4})_i$$

- 124 •  $y_i$  = the total abundance/prevalence for the  $i^{\text{th}}$  observation  $i = 1, 2, \dots, 180$ .
- 125 •  $\text{Operation2}_i = 1$  if observation  $i$  came from beekeeping Operation 2 and 0  
 126 otherwise.
- 127 •  $\text{Operation3}_i = 1$  if observation  $i$  came from beekeeping Operation 3 and 0  
 128 otherwise.
- 129 •  $\text{period2}_i = 1$  if observation  $i$  was taken during and 0 otherwise.

- 130 •  $\text{period3}_i = 1$  if observation  $i$  was taken after pollination and 0 otherwise.
- 131 •  $\text{period4}_i = 1$  if observation  $i$  was taken in the second after pollination sampling time  
132 and 0 otherwise.
- 133 •  $A_i = 1$  if observation  $i$  was Average (colony strength) and 0 otherwise.
- 134 •  $S_i = 1$  if observation  $i$  was Strong (colony strength) and 0 otherwise.

135 In the equation above,  $\gamma_{j(i)}$  is the random effect for colony. We assume  
136  $\gamma_{j(i)} \sim N(0, \sigma_{colony}^2)$ ,  $\epsilon_i \sim N(0, \sigma_y^2)$  and  $\gamma_{j(i)}$  and  $\epsilon_i$  are independent for all  $j = 1, 2, \dots, 60$ ,  
137  $i = 1, 2, 3, \dots, 180$ . S and W are indicators for strong and weak colony ratings. Here, we  
138 defined weak colonies from beekeeping Operation 1 during time period1 (before almond  
139 pollination) as the base-level for comparisons.  $\mu_i$  is the expected pathogen prevalence  
140 given the covariates. Since we observed an interaction between time period and  
141 strength rating, our question of interest must be evaluated in each of the time periods.  
142 Thus our final inferences are based on our estimates of  $\beta_3$ , the difference between  $\beta_4$   
143 and  $\beta_5$ ,  $\beta_6$  and  $\beta_7$ , and  $\beta_8$  and  $\beta_9$ ; the values for parameters in the equation that are not  
144 required to address specific questions become 0.

#### 145 **References associated with longitudinal monitoring of honey bee colonies.**

146 Longitudinal monitoring of colony health and pathogen prevalence and abundance is  
147 critical to determining the role of pathogens in colony losses (Berényi et al. 2006; Chen  
148 et al. 2014; Clermont et al. 2014; de Miranda et al. 2013; Delaplane and van der Steen  
149 2013; Ellis et al. 2010; Gajger et al. 2014; Genersch et al. 2010; Gisder et al. 2010;  
150 McMenamin and Genersch 2015; Nielsen et al. 2008; Ravoet et al. 2013; Runckel,

151 Flenniken et al. 2011; Spleen et al. 2013; Steinhauer et al. 2014; Tentcheva et al. 2004;  
152 van der Zee et al. 2012; van Engelsdorp et al. 2008; vanEngelsdorp et al. 2012;  
153 vanEngelsdorp et al. 2009; vanEngelsdorp et al. 2013).

154

155

156

157

158

159
